# Supplementary material for: A metal–oxo mediated approach to the synthesis of 21,22-diepi-membrarollin
Source: Royal Society of Chemistry journal article supplement (doi:10.1039/b512126d), 2005-01-01

# A Metal-oxo Mediated Approach to the Synthesis of 21,22-Diepimembrarollin

## Supporting Information

Yulai Hu, Richard C. D. Brown\*

### Mosher Ester Data

**Table 1.** Diagnostic <sup>1</sup>H-NMR values (400 MHz, CDCl<sub>3</sub>) of (*S*)- and (*R*)-MTPA esters **16** of the epoxide **12**.

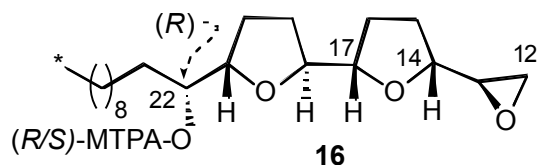

| Proton <sup>a</sup> | ( <i>S</i> )-MTPA ester | ( <i>R</i> )-MTPA ester | $\Delta_{(S-R)}$ | Configuration <sup>a</sup> |
|---------------------|-------------------------|-------------------------|------------------|----------------------------|
| 21                  | 4.05 ppm                | 4.13 ppm                | -0.08            | 22 <i>R</i>                |
| 23                  | 1.64 ppm                | 1.57 ppm                | +0.07            |                            |

<sup>a</sup> membrarollin numbering used

**Table 2.** Diagnostic <sup>1</sup>H-NMR values (400 MHz, CDCl<sub>3</sub>) of (*S*)- and (*R*)-MTPA esters **17** of the diol **13**.

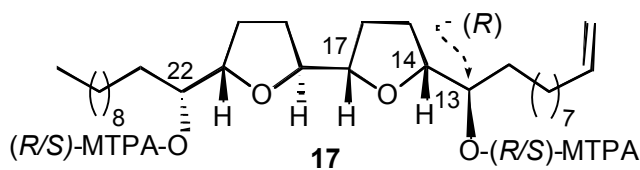

| Proton <sup>a</sup> | ( <i>S</i> )-MTPA ester | ( <i>R</i> )-MTPA ester | $\Delta_{(S-R)}$ | Configuration <sup>a</sup> |
|---------------------|-------------------------|-------------------------|------------------|----------------------------|
| 12                  | 1.62 ppm                | 1.50 ppm                | +0.12            | 13 <i>R</i>                |
| 14                  | 3.796 ppm               | 3.977 ppm               | -0.001           |                            |
| 21                  | 4.04 ppm                | 4.16 ppm                | -0.12            | 22 <i>R</i>                |
| 23                  | 1.60 ppm                | 1.56 ppm                | +0.04            |                            |

<sup>a</sup> membrarollin numbering used

# $^1\text{H}$ and $^{13}\text{C}$ NMR for the (*R*)-Mosher ester derivative 16

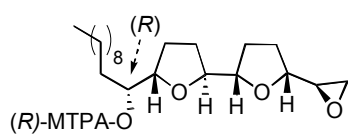

3498/78

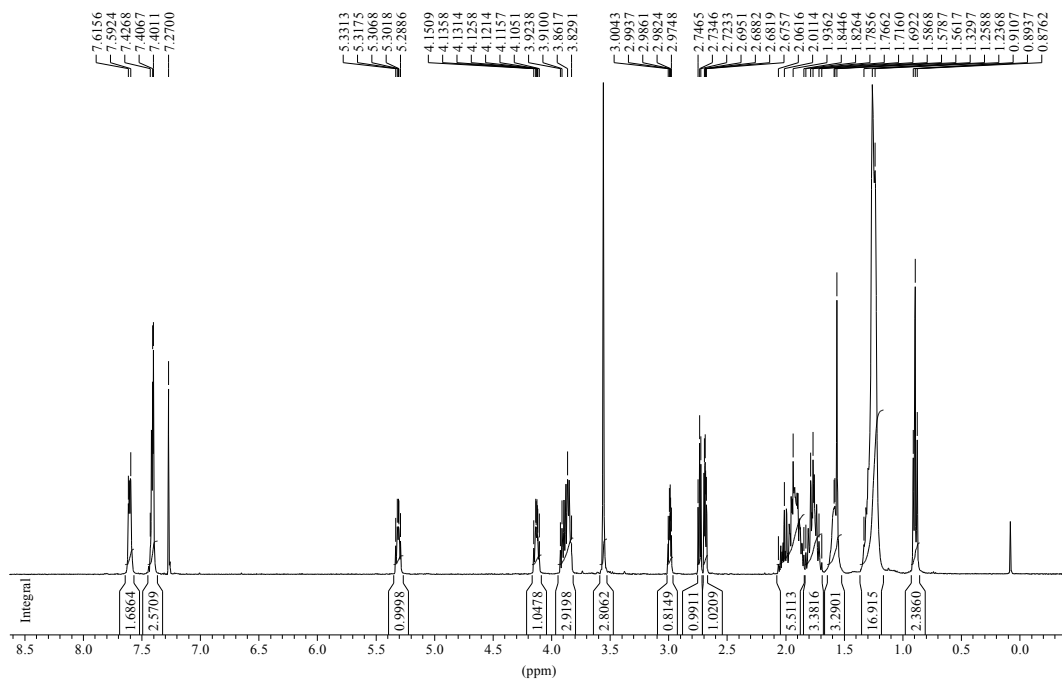

3498/78

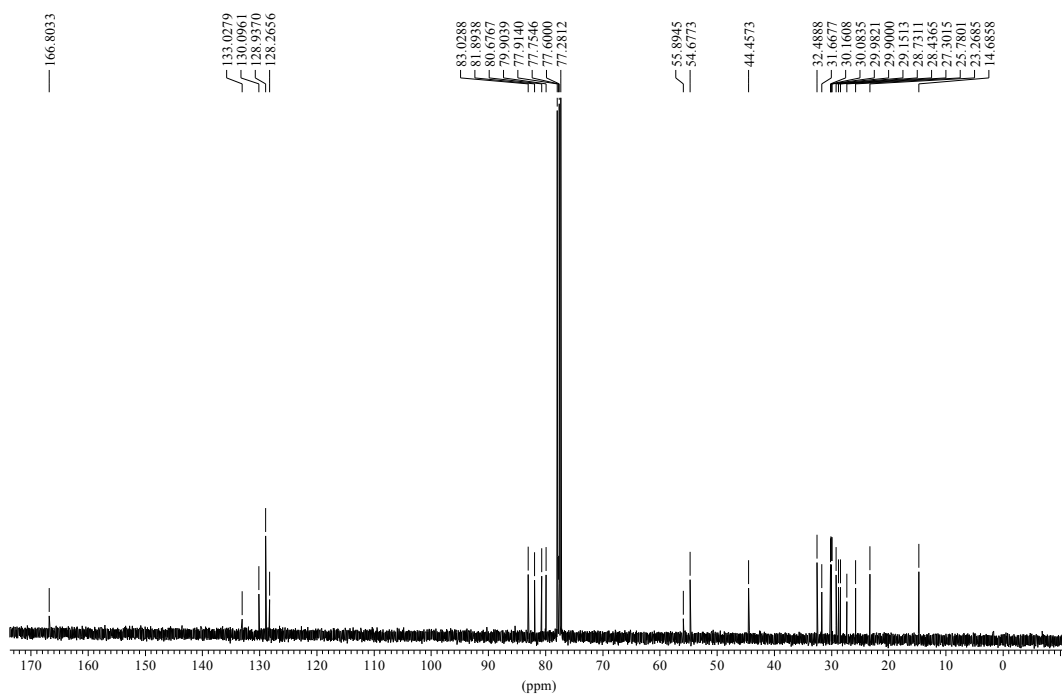

# $^1\text{H}$ and $^{13}\text{C}$ NMR for the (*S*)-Mosher ester derivative of **16**

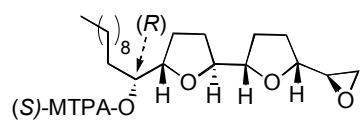

3498/76

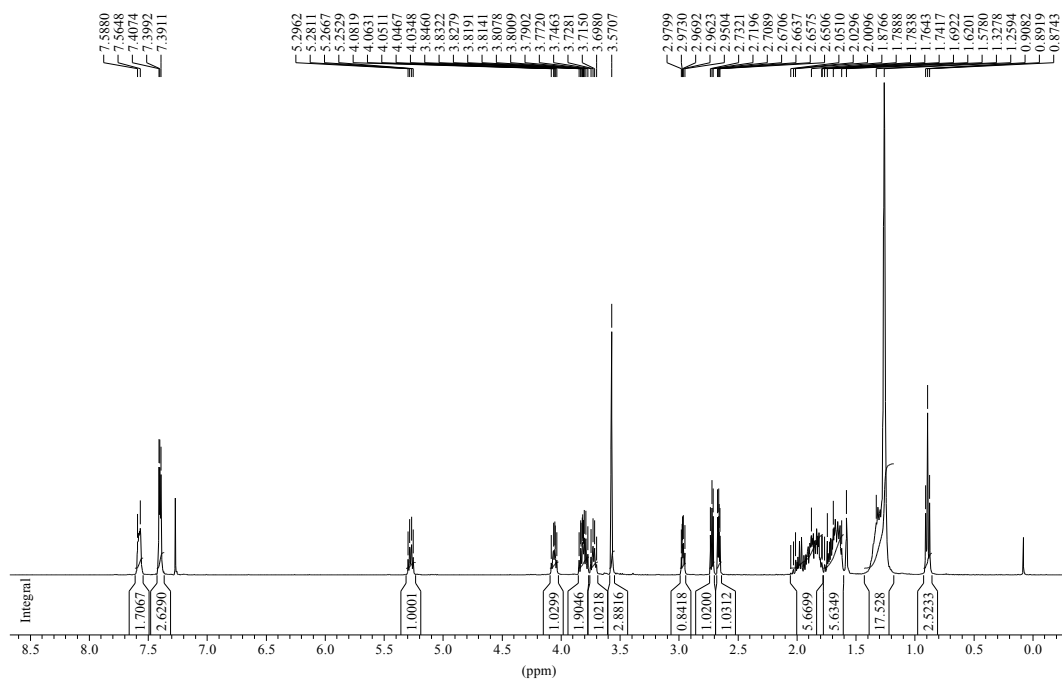

3498/76

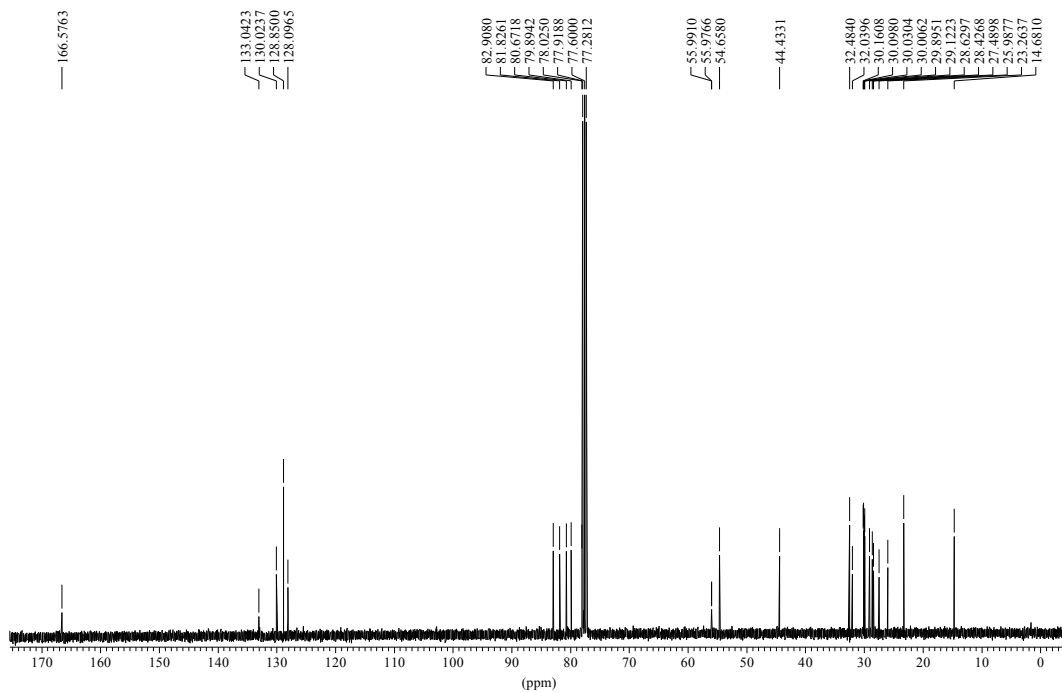

$^1\text{H}$  and  $^{13}\text{C}$  NMR for the *bis*-(*R*)-Mosher ester derivative **17**

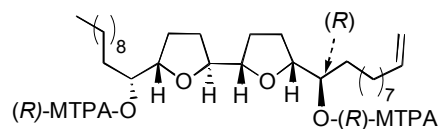

3498/79

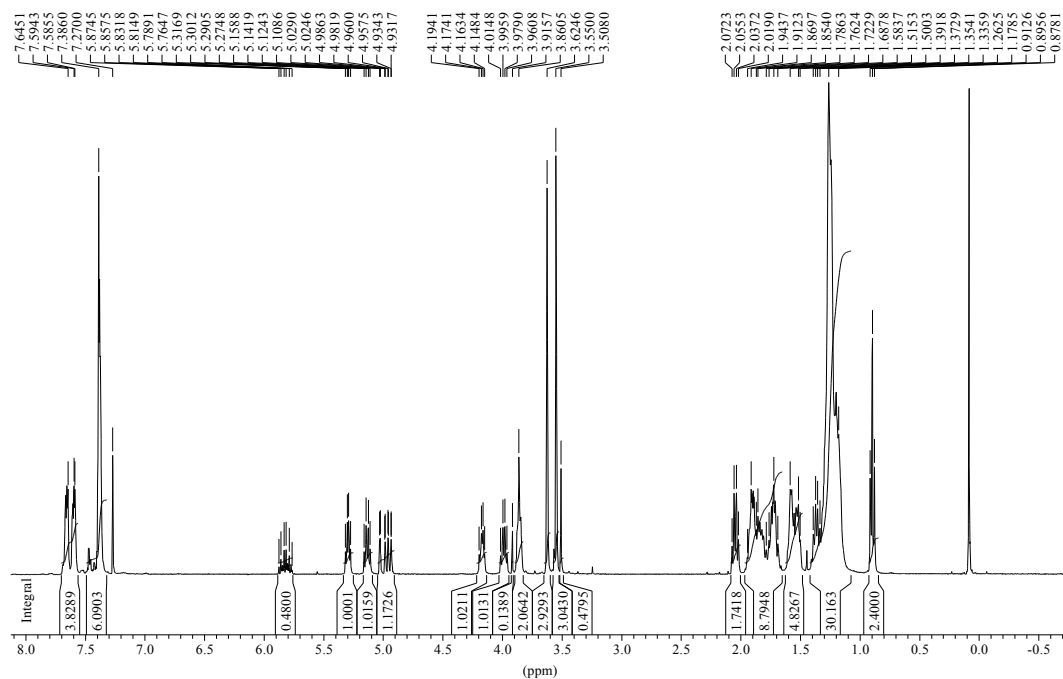

3498/79

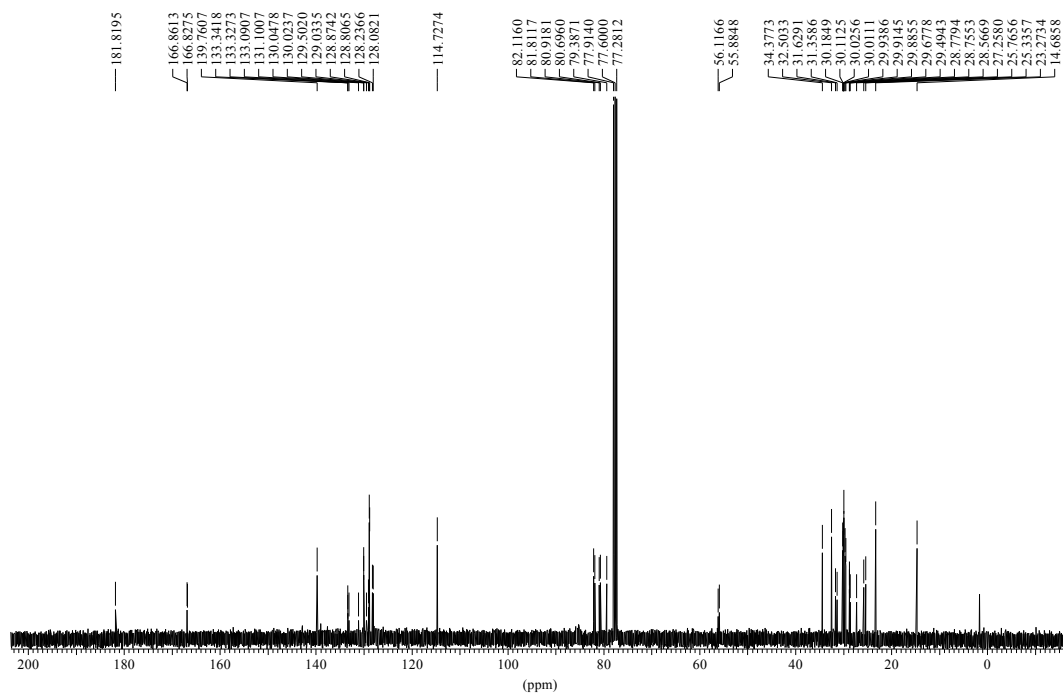

$^1\text{H}$  and  $^{13}\text{C}$  NMR for the *bis*-(*S*)-Mosher ester derivative **17**

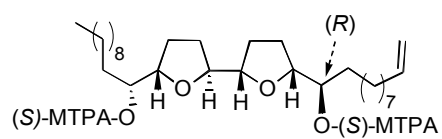

3498/80

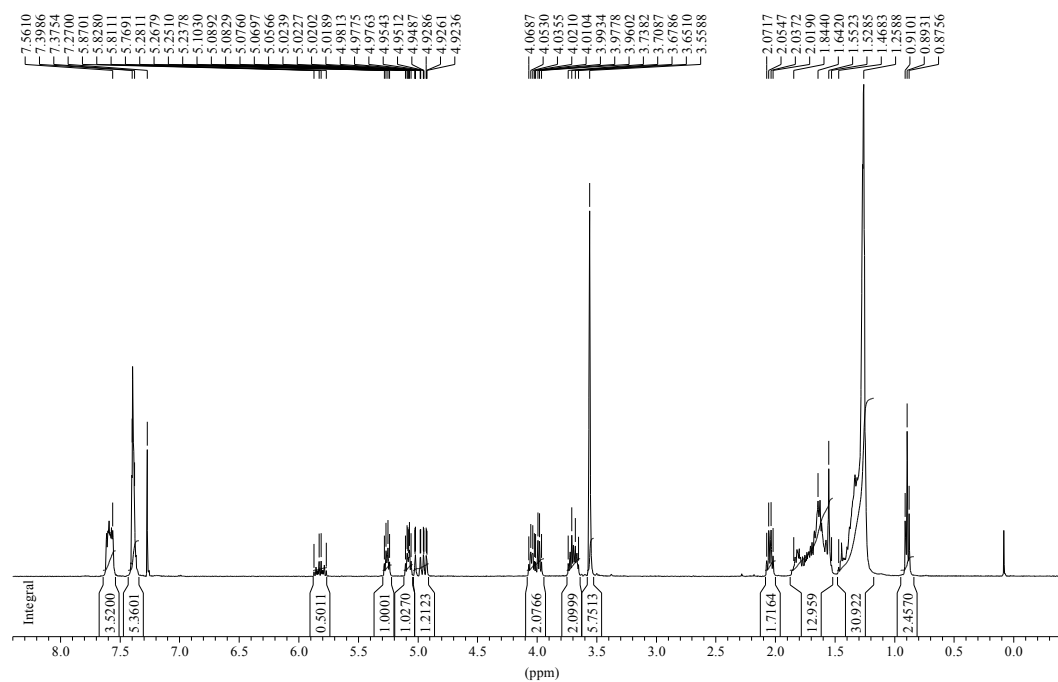

3498/80

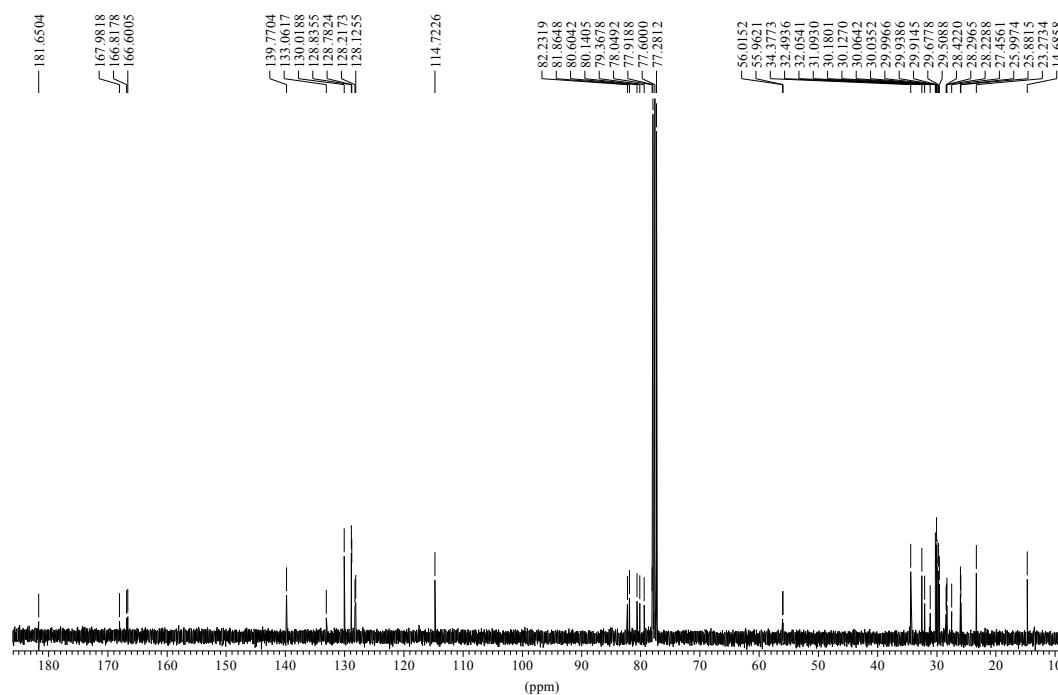

Supplement: b512126d.pdf [file b512126d.pdf]
